# Supplementary material
Source: PubMed Central journal article supplement (PMC1157046)
Supplement: pnas_0503259102_2.pdf [file pnas_0503259102_2.pdf]

Table 2 Ninety-six RET missense mutations identified from the literature and their corresponding clinical presentations

| Mutation | Kind of amino acid change* | Exon | Domain†       | Length of aganglionosis‡ | Reference   |
|----------|----------------------------|------|---------------|--------------------------|-------------|
| P20L     | NNP-NNP                    | 1    | SP            | S                        | 1           |
| S32L     | NP-NNP                     | 2    | CLD1          | L/S‡                     | 2, 3, 4     |
| L40P     | NNP-NNP                    | 2    | CLD1          | L                        | 5           |
| L56M     | NNP-NNP                    | 2    | CLD1          | S                        | 6           |
| R57W     | B-NNP                      | 2    | CLD1          | S                        | 7           |
| P64L     | NNP-NNP                    | 2    | CLD1          | S‡                       | 2, 3        |
| R77C     | B-NNP                      | 2    | CLD1          | L‡                       | 4, 8        |
| G93S     | NNP-NP                     | 2    | CLD1          | S, TCA                   | 1, 9        |
| Y96C     | NNP-NNP                    | 2    | CLD1          | L                        | 10          |
| E136X    | A-stop                     | 3    | CLD1          | L                        | 2           |
| C142S    | NNP-NP                     | 3    | CLD1          | S                        | 2           |
| V145G    | NNP-NNP                    | 3    | CLD1          | TCA                      | 11          |
| C157W    | NNP-NNP                    | 3    | CLD1-CLD2     |                          | 7           |
| C157Y    | NNP-NNP                    | 3    | CLD1-CLD2     | S                        | 6           |
| F174S    | NNP-NP                     | 3    | CLD2          | S                        | 12          |
| R180P    | B-NNP                      | 3    | CLD2          | L                        | 13          |
| R180Q    | B-NP                       | 3    | CLD2          | S                        | 6           |
| R180X    | B-stop                     | 3    | CLD2          | L                        | 3           |
| C197Y    | NNP-NNP                    | 4    | CLD2          | L                        | 12          |
| V202M    | NNP-NNP                    | 4    | CLD2          | S                        | 14          |
| R231H    | B-B                        | 4    | CLD2          | L/S                      | 2, 9        |
| E235K    | A-B                        | 4    | CLD2          | S                        | 6           |
| E251K    | A-B                        | 4    | CLD2          | L/S                      | 2, 9        |
| V262A    | NNP-NNP                    | 4    | CLD2          | L                        | 10          |
| D267N    | A-NP                       | 4    | CLD2          | L                        | 10          |
| R287Q    | B-NP                       | 4    | CLD3          | L                        | 2           |
| E289Q    | A-NP                       | 4    | CLD3          | S                        | 9           |
| R313Q    | B-NP                       | 5    | CLD3          | TCA+                     | 13          |
| W324C    | NNP-NNP                    | 5    | CLD3          | S                        | 10          |
| R330Q    | B-NP                       | 5    | CLD3          | L                        | 1, 2, 3     |
| R330W    | B-NNP                      | 5    | CLD3          | L/S                      | 6           |
| V331M    | NNP-NNP                    | 5    | CLD3          | S                        | 15          |
| T338I    | NP-NNP                     | 5    | CLD3          | L                        | 10          |
| R360W    | B-NNP                      | 6    | CLD3          | L                        | 4           |
| N361K    | NP-B                       | 6    | CLD3          | S                        | 6           |
| S365X    | NP-stop                    | 6    | CLD3          | L                        | 5           |
| F393L    | NNP-NNP                    | 6    | CLD3-CLD4     | L                        | 2           |
| N394K    | NP-B                       | 6    | CLD3-CLD4     | L                        | 4           |
| P399L    | NNP-NNP                    | 6    | CLD3-CLD4     | S                        | 5           |
| D469N    | A-NP                       | 7    | CLD4          | TCA+                     | 16          |
| R475Q    | B-NP                       | 7    | CLD4          | L                        | 2           |
| R475W    | B-NNP                      | 7    | CLD4          | S                        | 10          |
| E480K    | A-B                        | 7    | CLD4          | S                        | 14          |
| Y483X    | NNP-stop                   | 7    | CLD4          | S                        | 11          |
| C541X    | NNP-stop                   | 8    | CYS           | S                        | 5           |
| C570W    | NNP-NNP                    | 9    | CYS           | S                        | 9           |
| Q576P    | NP-NNP                     | 9    | CYS           | S                        | 6           |
| D584G    | A-NNP                      | 9    | CYS           | S                        | 17          |
| G588D    | NNP-A                      | 10   | CYS           | TCA+                     | 16          |
| C609W    | NNP-NNP                    | 10   | CYS           | S, MEN2A, FMTC           | 7           |
| C609Y    | NNP-NNP                    | 10   | CYS           | S, MEN2A                 | 1, 6, 9, 18 |
| C609R    | NNP-B                      | 10   | CYS           | L, MEN2A, FMTC           | 8           |
| C609S    | NNP-NP                     | 10   | CYS           | S, MEN2A                 | 10          |
| C611F    | NNP-NNP                    | 10   | CYS           | MEN2A, FMTC              | 7           |
| C618R    | NNP-B                      | 10   | CYS           | MEN2A, FMTC              | 7           |
| C618S    | NNP-NP                     | 10   | CYS           | L, S, MEN2A              | 18          |
| C620R    | NNP-B                      | 10   | CYS           | S, MEN2A, FMTC           | 6, 13, 19   |
| C620S    | NNP-NP                     | 10   | CYS           | MEN2A, FMTC              | 7           |
| C620W    | NNP-NNP                    | 10   | CYS           | S, MEN2A                 | 18          |
| Q626K    | NP-B                       | 10   | CYS           |                          | 7           |
| C634R    | NNP-B                      | 11   | CYS           | MEN2A                    | 7           |
| C634T    | NNP-NP                     | 11   | CYS           | MEN2A                    | 7           |
| C634G    | NNP-NNP                    | 11   | CYS           | MEN2A                    | 7           |
| A654T    | NNP-NP                     | 11   | TM            | L                        | 17          |
| S690P    | NP-NNP                     | 11   | btw TM and TK | L                        | 2           |
| G691S    | NNP-NP                     | 11   | btw TM and TK |                          | 20          |
| R694Q    | B-NP                       | 11   | btw TM and TK | S                        | 11          |
| T706A    | NP-NNP                     | 12   | btw TM and TK | L                        | 17          |
| T729A    | NP-NNP                     | 12   | btw TM and TK |                          | 7           |
| E734K    | A-B                        | 12   | btw TM and TK | TCA+                     | 16          |
| E762Q    | A-NP                       | 13   | TK            | L                        | 5           |
| S765F    | NP-NNP                     | 13   | TK            | L                        | 7           |
| S765P    | NP-NNP                     | 13   | TK            | L                        | 21          |
| S767R    | NP-B                       | 13   | TK            | L                        | 2           |
| E768D    | A-A                        | 13   | TK            | FMTC                     | 22          |
| D771N    | A-NP                       | 13   | TK            | TCA                      | 14          |
| K780X    | B-stop                     | 13   | TK            | L                        | 10          |
| L790F    | NNP-NNP                    | 13   | TK            |                          | 7           |
| Y791F    | NNP-NNP                    | 13   | TK            | S                        | 10, 13, 15  |
| S795R    | NP-B                       | 13   | TK            | S                        | 15          |
| V804L    | NNP-NNP                    | 14   | TK            | FMTC                     | 23          |
| V804M    | NNP-NNP                    | 14   | TK            |                          | 7           |

|        |          |    |          |         |            |
|--------|----------|----|----------|---------|------------|
| R813Q  | B-NP     | 14 | TK       |         | 7          |
| R873Q  | B-NP     | 15 | TK       | L       | 2, 10      |
| A884F  | NNP-NNP  | 15 | TK       |         | 7          |
| F893L  | NNP-NNP  | 15 | TK       | L       | 2          |
| G894S  | NNP-NP   | 15 | TK       | L       | 10         |
| R897Q  | B-NP     | 15 | TK       | L       | 10, 16, 21 |
| K907E  | B-A      | 15 | TK       | L/S     | 2, 6       |
| R912Q  | B-NP     | 16 | TK       | S       | 10         |
| M918T  | NNP-NP   | 16 | TK       |         | 7          |
| E921X  | A-stop   | 16 | TK       | L       | 2, 6, 7    |
| E921K  | A-B      | 16 | TK       |         | 7          |
| W942X  | NNP-stop | 17 | TK       | S       | 2          |
| W942C  | NNP-NNP  | 17 | TK       | TCA+    | 16         |
| F961L  | NNP-NNP  | 17 | TK       | S       | 11         |
| R969W  | B-NNP    | 17 | TK       | TCA+    | 16         |
| R972G  | B-NNP    | 17 | TK       | L       | 21         |
| P973L  | NNP-NNP  | 17 | TK       | L       | 5, 14      |
| M980T  | NNP-NP   | 17 | TK       | S       | 2          |
| R982C  | B-NNP    | 18 | TK       | S       | 15, 19     |
| P1039L | NNP-NNP  | 19 | after TK |         | 7          |
| L1061P | NNP-NNP  | 19 | after TK | L/S/TCA | 6          |
| M1064T | NNP-NP   | 20 | after TK | S       | 2          |

In the text, L-HSCR (HSCR, Hirschsprung Disease) patients include those with TCA. Where both L-HSCR and S-HSCR were found to be associated with a particular mutation all presentations are listed. If one presentation predominated by greater than 2:1, the more frequent presentation is listed. These classifications were used for all calculations in the text.

\*amino acid key: NNP, neutral non-polar; NP, neutral polar; A, acidic; B, basic

†Domain key: SP, signal peptide; CLD, cadherin-like domain; CYS, cysteine-rich domain;

TM, transmembrane domain; TK, tyrosine kinase domain.

‡Length of Aganglionosis key: S, short segment HSCR; L, long segment HSCR;

TCA, total colonic aganglionosis; TCA+, TCA and small intestine and stomach aganglionosis;

MEN2A, Multiple endocrine neoplasia type 2A; CCHS, Central congenital hyperventilation syndrome;

‡, Severe constipation observed.

#### References cited in Table 2

- 1 Angrist, M., Bolk, S., Thiel, B., Puffenberger, E. G., Hofstra, R. M., Buys, C. H., Cass, D. T. & Chakravarti, A. (1995) *Hum Mol Genet* 4, 821-30.
- 2 Attie, T., Pelet, A., Eder, P., Eng, C., Mulligan, L. M., Amiel, J., Boutrand, L., Beldjord, C., Nihoul-Fekete, C., Munnich, A. & et al. (1995) *Hum Mol Genet* 4, 1381-6.
- 3 Eder, P., Lyonnet, S., Mulligan, L. M., Pelet, A., Dow, E., Abel, L., Holder, S., Nihoul-Fekete, C., Ponder, B. A. & Munnich, A. (1994) *Nature* 367, 378-80.
- 4 Bolk, S., Pelet, A., Hofstra, R. M., Angrist, M., Salomon, R., Croaker, D., Buys, C. H., Lyonnet, S. & Chakravarti, A. (2000) *Proc Natl Acad Sci U S A* 97, 268-73.
- 5 Yin, L., Barone, V., Seri, M., Bolino, A., Bocciardi, R., Ceccherini, I., Pasini, B., Tocco, T., Lerone, M., Cywes, S. & et al. (1994) *Eur J Hum Genet* 2, 272-80.
- 6 Hofstra, R. M., Wu, Y., Stulp, R. P., Elfferich, P., Osinga, J., Maas, S. M., Siderius, L., Brooks, A. S., vd Ende, J. J., Heydendaal, V. M., Severijnen, R. S., Bax, K. M., Meijers, C. & Buys, C. H. (2000) *Hum Mutat* 15, 418-29.
- 7 McCallion, A. S. & Chakravarti, A. (2004) in *Inborn Errors of Development (Chapter 36)*, eds. Epstein, C., Erickson, R. & Wynshaw-Boris, A. (Oxford University Press, San Francisco.), Vol. 1.
- 8 Munnes, M., Fanaei, S., Schmitz, B., Muiznieks, I., Holschneider, A. M. & Doerfler, W. (2000) *Am J Med Genet* 94, 19-27.
- 9 Gabriel, S. B., Salomon, R., Pelet, A., Angrist, M., Amiel, J., Fornage, M., Attie-Bitach, T., Olson, J. M., Hofstra, R., Buys, C., Steffann, J., Munnich, A., Lyonnet, S. & Chakravarti, A. (2002) *Nat Genet* 31, 89-93.
- 10 Fitze, G., Cramer, J., Ziegler, A., Schierz, M., Schreiber, M., Kuhlisch, E., Roesner, D. & Schackert, H. K. (2002) *Lancet* 359, 1200-5.
- 11 Garcia-Barcelo, M., Sham, M. H., Lee, W. S., Lui, V. C., Chen, B. L., Wong, K. K., Wong, J. S. & Tam, P. K. (2004) *Clin Chem* 50, 93-100.
- 12 Kusafuka, T., Wang, Y. & Puri, P. (1997) *J Pediatr Surg* 32, 501-4.
- 13 Seri, M., Yin, L., Barone, V., Bolino, A., Celli, I., Bocciardi, R., Pasini, B., Ceccherini, I., Lerone, M., Kristofferson, U., Larsson, L. T., Casasa, J. M., Cass, D. T., Abramowicz, M. J., Vanderwinden, J. M., Kravcenkiene, I., Baric, I., Silengo, M., Martucciello, G. & Romeo, G. (1997) *Hum Mutat* 9, 243-9.
- 14 Julies, M. G., Moore, S. W., Kotze, M. J. & du Plessis, L. (2001) *Eur J Hum Genet* 9, 419-23.
- 15 Sancandi, M., Ceccherini, I., Costa, M., Fava, M., Chen, B., Wu, Y., Hofstra, R., Laurie, T., Griffiths, M., Burge, D. & Tam, P. K. (2000) *J Pediatr Surg* 35, 139-42; discussion 142-3.
- 16 Inoue, K., Shimotake, T. & Iwai, N. (2000) *Am J Med Genet* 93, 278-84.
- 17 Sakai, T., Nirasawa, Y., Itoh, Y. & Wakizaka, A. (2000) *Eur J Pediatr* 159, 160-7.
- 18 Decker, R. A., Peacock, M. L. & Watson, P. (1998) *Hum Mol Genet* 7, 129-34.
- 19 Svensson, P. J., Molander, M. L., Eng, C., Anvret, M. & Nordenskjold, A. (1998) *Clin Genet* 54, 39-44.
- 20 Borrego, S., M. E. Saez, et al. (1999) *J Med Genet* 36(10): 771-4.
- 21 Romeo, G., Ronchetto, P., Luo, Y., Barone, V., Seri, M., Ceccherini, I., Pasini, B., Bocciardi, R., Lerone, M., Kaariainen, H. & et al. (1994) *Nature* 367, 377-8.
- 22 Boccia, L. M., J. S. Green, et al. (1997) *Clin Genet* 51(2): 81-5.
- 23 Eng, C. and L. M. Mulligan (1997) *Hum Mutat* 9(2): 97-109.
