# Supplementary material
Source: PubMed Central journal article supplement (PMC1157046)
Supplement: pnas_0503259102_3.pdf [file pnas_0503259102_3.pdf]

## Supporting Text

### Methods

These were standardized to be unitless with mean zero and variance one. Let  $A_{ij}$  denote the amino acid from sequence  $i$  in position  $j$  of the alignment, let  $s$  be any standardized scale, and let  $s(A_{ij})$  be the value of amino acid  $A_{ij}$  on that scale. For each position  $j$  in the alignment, the positional mean and variance were computed, respectively, as  $\mu_j = \sum_i w_i s(A_{ij})$  and  $\sigma_j^2 = \sum_i w_i (s(A_{ij}) - \mu_j)^2$ . We supposed that the  $s$ -specific disagreement between the alignment column and an amino acid  $z$  with value  $s(z)$  could be quantified by  $\frac{s(z) - \mu_j}{\sigma_j}$ . By folding together the specific disagreement values for each property, an aggregate score (called a MAPP score) was developed to test the overall incompatibility of amino acid  $z$  to position  $j$ . We compared MAPP scores to an  $F$ -distribution to assess the impact of candidate substitutions.
