# Supplementary material
Source: PubMed Central journal article supplement (PMC1157046)

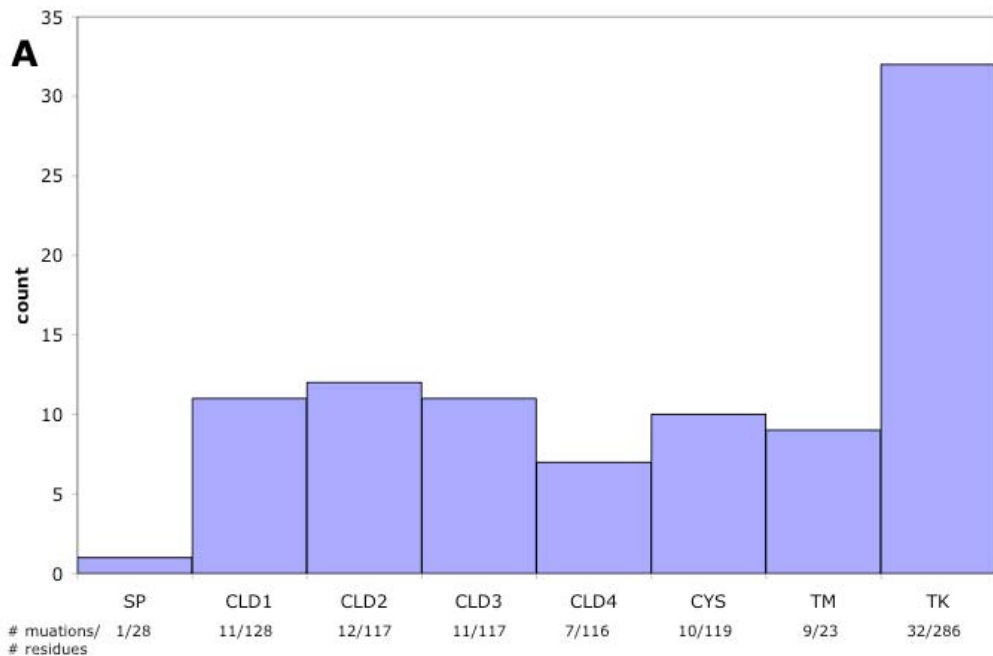

Supplement: pnas_0503259102_4.pdf [file pnas_0503259102_4.pdf]

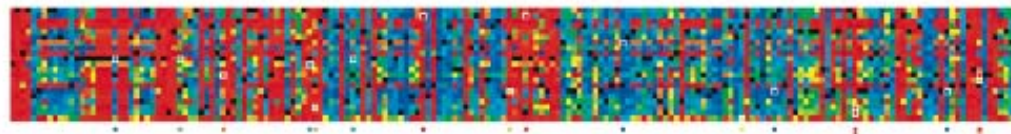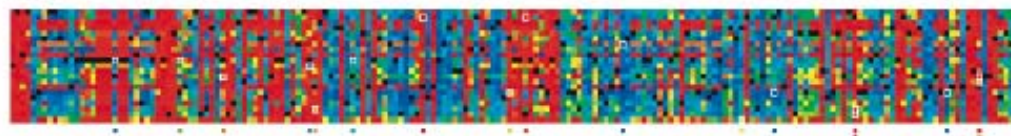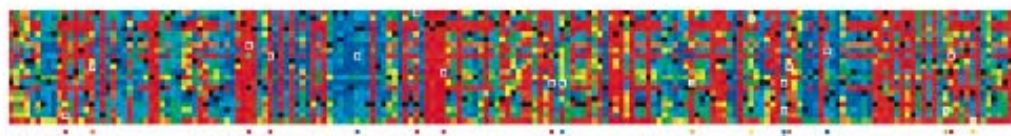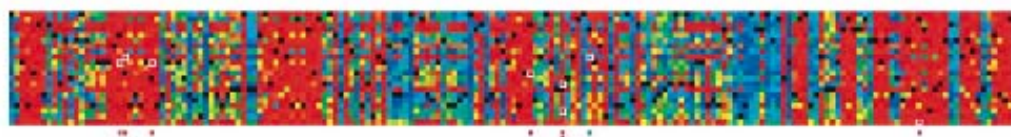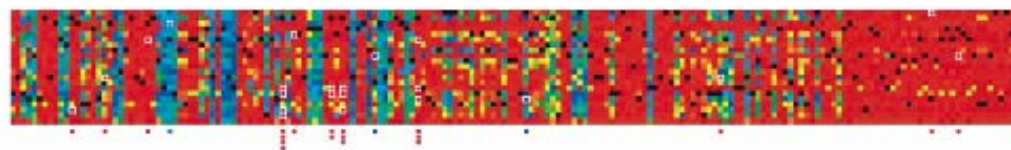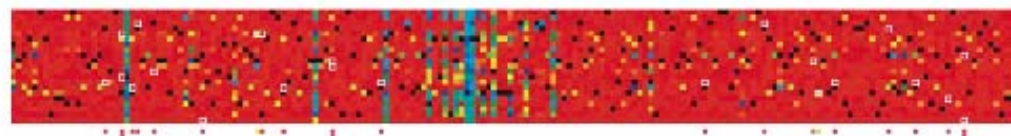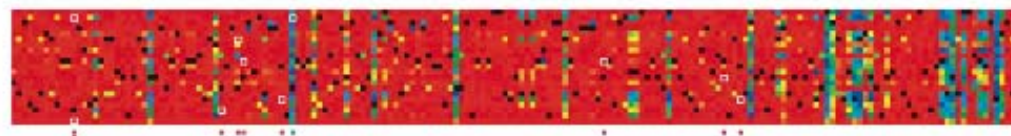

Supplement: pnas_0503259102_6.pdf [file pnas_0503259102_6.pdf]

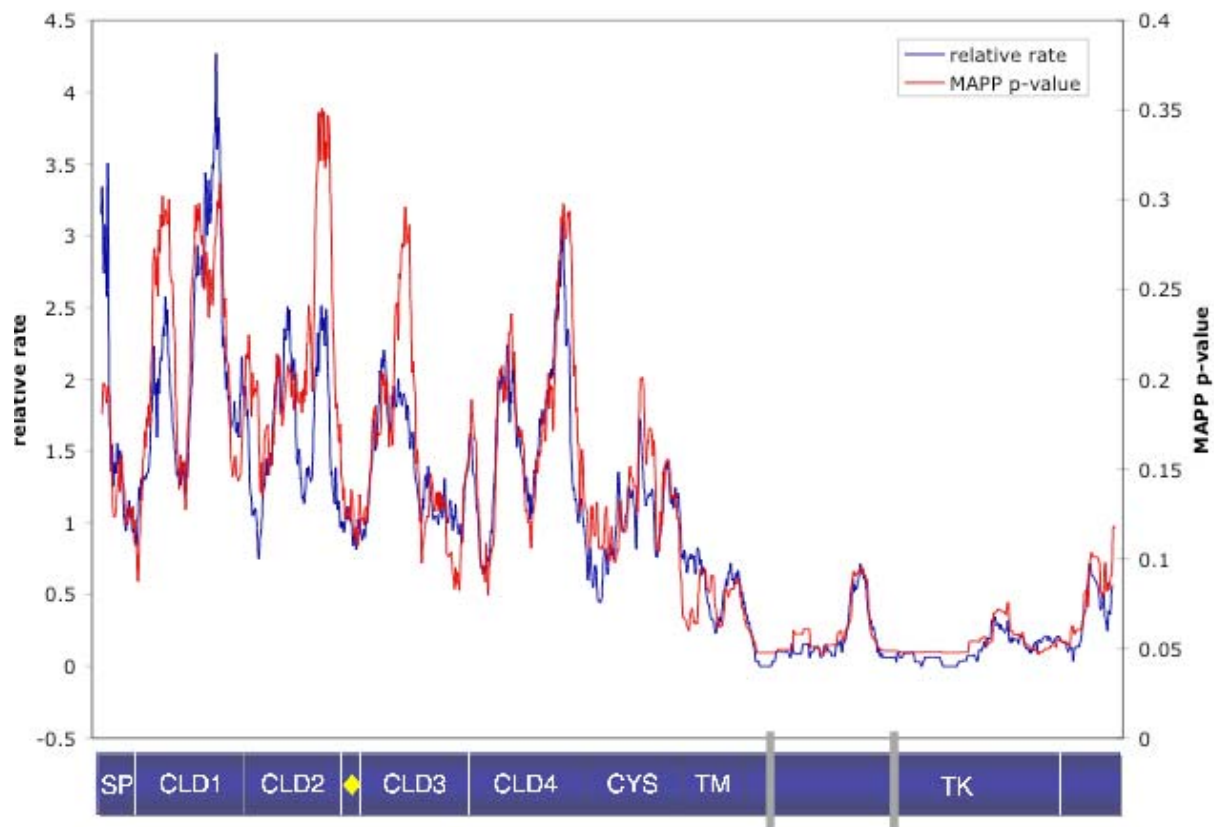

Supplement: pnas_0503259102_7.pdf [file pnas_0503259102_7.pdf]
